# Supplementary material for: Technical Note: A global database of the stable isotopic ratios of meteoric and terrestrial waters
Source: Copernicus journal article supplement (doi:10.5194/hess-23-4389-2019), 2019-10-28
Supplement: Supplementary file 1 [file hess-23-4389-2019-supplement.zip]

# Supplemental Material for ‘Technical note: A global database of the stable isotopic ratios of meteoric and terrestrial waters’

Annie L. Putman<sup>1,2</sup> and Gabriel J. Bowen<sup>1,2</sup>

<sup>1</sup>University of Utah Geology & Geophysics, University of Utah, 383 F.A. Sutton Bldg. 115 S. 1460 E., Salt Lake City, UT 84112-0102, US

<sup>2</sup>Global Change & Sustainability Center, University of Utah, 234 F.A. Sutton Bldg. 115 S. 1460 E., Salt Lake City, UT 84112-0102, US

**Correspondence:** Annie Putman (putmanannie@gmail.com)

1. Data upload template
2. Database records

## 1 Data upload template

The template for data organization for upload to the database, named WI\_template.xlsx, is included as a separate file.

## 5 2 Database records for individual projects

All projects associated with the database (as of July 2019) are described in the Projects.xlsx spreadsheet which is included as a separate file. Projects in each subsection are organized by Project ID, and include number of samples and sites, sampling date range, reference and doi or url, notes, and geographical region information. The projects categories chosen highlight the wide variety of sources of data, including network-based datasets, agency supported data collection efforts, published, and unpublished work. All datasets are available from the wiDB unless otherwise noted. If projects are not redistributable, we comment on where data may be accessed.
