# Supplementary material for: Technical Note: A global database of the stable isotopic ratios of meteoric and terrestrial waters
Source: Copernicus journal article supplement (doi:10.5194/hess-23-4389-2019), 2019-10-28
Supplement: Supplementary file 2 [file hess-23-4389-2019-supplement.zip]

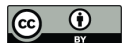

## *Supplement of*

# **Technical Note: A global database of the stable isotopic ratios of meteoric and terrestrial waters**

**Annie L. Putman and Gabriel J. Bowen**

*Correspondence to:* Annie L. Putman (putmanannie@gmail.com)

- [hess-23-4389-2019-supplement-title-page.pdf](#)
- Supplemental
  - Projects.xlsx
  - WI\_Template.xlsx
  - desktop.ini
  - wiDB\_HESS\_Supp.pdf

The copyright of individual parts of the supplement might differ from the CC BY 4.0 License.
